# Supplementary material for: Double-strand breaks induce inverted duplication chromosome rearrangements by a DNA polymerase δ-dependent mechanism
Source: PubMed Central journal article supplement (PMC10622511; doi:10.1038/s41467-023-42640-5), 2023-11-02

**Supplementary Table 1. Survival and inverted duplication frequencies**

| Relevant genotype          | gRNA     | Target IR | Median survival <sup>a</sup> | Relative survival <sup>b</sup> | Fraction inverted duplications | Inverted duplication frequency <sup>c</sup> | Relative inverted duplication frequency |
|----------------------------|----------|-----------|------------------------------|--------------------------------|--------------------------------|---------------------------------------------|-----------------------------------------|
| <i>sae2Δ</i>               | gRNA-17  | Natural   | 0.081                        | 1                              | 0.91                           | 0.074                                       | 1                                       |
| <i>mre11-H125N</i>         | gRNA-17  | Natural   | 0.178                        | 2.18                           | ND                             | ND                                          | ND                                      |
| <i>mre11Δ</i>              | gRNA-17  | Natural   | 0.093                        | 1.14                           | 0.87                           | 0.081                                       | 1.08                                    |
| WT                         | gRNA-17  | Natural   | 0.0004                       | 0.0048                         | 0.09                           | 3.54 x10 <sup>-5</sup>                      | 4.7 X 10 <sup>-4</sup>                  |
| <i>sae2Δ</i>               | gRNA-17  | Scrambled | 0.0035                       | 0.044                          | 0.16                           | 0.0006                                      | 0.008                                   |
| <i>sae2Δ rad1Δ</i>         | gRNA-17  | Natural   | 0.087                        | 1.07                           | 0.86                           | 0.075                                       | 1.01                                    |
| <i>sae2Δ pol3-01</i>       | gRNA-17  | Natural   | 0.0068                       | 0.084                          | 0.65                           | 0.004                                       | 0.06                                    |
| <i>sae2Δ pol3-01 rad1Δ</i> | gRNA-17  | Natural   | 0.0039                       | 0.048                          | 0.76                           | 0.003                                       | 0.04                                    |
| <i>sae2Δ mus81Δ</i>        | gRNA-17  | Natural   | 0.089                        | 1.01                           | 0.87                           | 0.077                                       | 1.04                                    |
| <i>sae2Δ</i>               | gRNA-17  | Perfect   | 0.102                        | 1.25                           | 0.93                           | 0.095                                       | 1.28                                    |
| <i>sae2Δ rad1Δ</i>         | gRNA-17  | Perfect   | 0.308                        | 3.79                           | 0.93                           | 0.288                                       | 3.97                                    |
| <i>sae2Δ pol3-01</i>       | gRNA-17  | Perfect   | 0.016                        | 0.20                           | 0.41                           | 0.007                                       | 0.09                                    |
| <i>sae2Δ pol3-01 rad1Δ</i> | gRNA-17  | Perfect   | 0.026                        | 0.32                           | 0.42                           | 0.011                                       | 0.15                                    |
| <i>sae2Δ</i>               | gRNA-48  | Natural   | 0.011                        | 0.13                           | 0.59                           | 0.006                                       | 0.087                                   |
| <i>sae2Δ rad1Δ</i>         | gRNA-48  | Natural   | 0.0082                       | 0.10                           | 0.53                           | 0.004                                       | 0.059                                   |
| <i>sae2Δ</i>               | gRNA-160 | Natural   | 0.0017                       | 0.021                          | 0.48                           | 0.0008                                      | 0.011                                   |
| <i>sae2Δ rad1Δ</i>         | gRNA-160 | Natural   | 0.0013                       | 0.016                          | 0.15                           | 0.0002                                      | 0.003                                   |
| <i>sae2Δ pol32Δ</i>        | gRNA-17  | Natural   | 0.0039                       | 0.048                          | 0.13                           | 0.0005                                      | 0.007                                   |
| <i>sae2Δ rad51Δ</i>        | gRNA-17  | Natural   | 0.0029                       | 0.0357                         | 0.83                           | 0.002                                       | 0.032                                   |
| <i>sae2Δ</i>               | HO       | Natural   | 0.264                        | 3.25                           | 0.92                           | 0.24                                        | 3.28                                    |
| WT                         | HO       | Natural   | 0.0033                       | 0.012                          | 0.025                          | 8.26 X 10 <sup>-5</sup>                     | 0.001                                   |

<sup>a</sup> Median survival value from at least 6 independent cultures

<sup>b</sup> Cell survival normalized to the *sae2Δ* mutant with the natural IR and gRNA-17

<sup>c</sup> Frequency of inverted duplications was derived from the fraction of survivors with a CNV value of >1.5.

**Supplementary Table 2. Analysis of survivors using gRNA-48 and gRNA-160**

| <b>Strain</b>                                      | <b>N</b> | <b>Inverted duplications</b> | <b>Target IR</b> | <b>Non-target IR (telomeric)</b> | <b>Non-target IR (centromeric)</b> |
|----------------------------------------------------|----------|------------------------------|------------------|----------------------------------|------------------------------------|
| <i>sae2</i> $\Delta$ gRNA-48                       | 60       | 38                           | 27               | 3                                | 8                                  |
| <i>sae2</i> $\Delta$ <i>rad1</i> $\Delta$ gRNA-48  | 60       | 40                           | 17               | 21                               | 2                                  |
| <i>sae2</i> $\Delta$ gRNA-160                      | 110      | 52                           | 6                | 12                               | 34                                 |
| <i>sae2</i> $\Delta$ <i>rad1</i> $\Delta$ gRNA-160 | 104      | 28                           | 7                | 11                               | 10                                 |

**Supplementary Table 3. Yeast Strains**

| Strain      | Relevant Genotype <sup>1</sup>                    | gRNA     | IR        | Nuclease                   |
|-------------|---------------------------------------------------|----------|-----------|----------------------------|
| W1588-4C    | <i>MATa</i>                                       | n/a      | Native    | n/a                        |
| LSY4708     | <i>MATa</i>                                       | n/a      | Native    | P <sub>lexO</sub> -Cas9-ER |
| LSY4713     | <i>MATa</i>                                       | gRNA-17  | Native    | P <sub>lexO</sub> -Cas9-ER |
| LSY4714     | <i>MATα</i>                                       | gRNA-17  | Native    | P <sub>lexO</sub> -Cas9-ER |
| LSY4751-11C | <i>MATα sae2::KanMX6</i>                          | gRNA-17  | Native    | P <sub>lexO</sub> -Cas9-ER |
| LSY4752-4C  | <i>MATα mre11::HIS3MX6</i>                        | gRNA-17  | Native    | P <sub>lexO</sub> -Cas9-ER |
| LSY4763-7D  | <i>MATa mre11-H125N</i>                           | gRNA-17  | Native    | P <sub>lexO</sub> -Cas9-ER |
| LSY4903     | <i>MATa</i>                                       | gRNA-17  | Scrambled | P <sub>lexO</sub> -Cas9-ER |
| LSY4913-2D  | <i>MATα sae2::KanMX6</i>                          | gRNA-17  | Scrambled | P <sub>lexO</sub> -Cas9-ER |
| LSY4616     | <i>MATa rad1::HphMX6</i>                          | n/a      | Native    | n/a                        |
| LSY4762-6A  | <i>MATα rad1::HphMX6</i>                          | gRNA-17  | Native    | P <sub>lexO</sub> -Cas9-ER |
| LSY4762-45D | <i>MATα sae2::KanMX6 rad1::HphMX4</i>             | gRNA-17  | Native    | P <sub>lexO</sub> -Cas9-ER |
| LSY5068-8D  | <i>MATa sae2::KanMX6 pol3-01</i>                  | gRNA-17  | Native    | P <sub>lexO</sub> -Cas9-ER |
| LSY5068-14D | <i>MATα sae2::KanMX6 pol3-01<br/>rad1::HphMX4</i> | gRNA-17  | Native    | P <sub>lexO</sub> -Cas9-ER |
| LSY5052     | <i>MATa</i>                                       | gRNA-48  | Native    | P <sub>lexO</sub> -Cas9-ER |
| LSY5054     | <i>MATα sae2::KanMX6</i>                          | gRNA-48  | Native    | P <sub>lexO</sub> -Cas9-ER |
| LSY5056     | <i>MATa rad1::HphMX4</i>                          | gRNA-48  | Native    | P <sub>lexO</sub> -Cas9-ER |
| LSY5193     | <i>MATα sae2::KanMX6 rad1::HphMX4</i>             | gRNA-48  | Native    | P <sub>lexO</sub> -Cas9-ER |
| LSY5053     | <i>MATa</i>                                       | gRNA-160 | Native    | P <sub>lexO</sub> -Cas9-ER |
| LSY5055     | <i>MATα sae2::KanMX6</i>                          | gRNA-160 | Native    | P <sub>lexO</sub> -Cas9-ER |
| LSY5057     | <i>MATa rad1::HphMX4</i>                          | gRNA-160 | Native    | P <sub>lexO</sub> -Cas9-ER |
| LSY5059     | <i>MATa sae2::KanMX6 rad1::HphMX4</i>             | gRNA-160 | Native    | P <sub>lexO</sub> -Cas9-ER |
| LSY4904     | <i>MATa</i>                                       | gRNA-17  | Perfect   | P <sub>lexO</sub> -Cas9-ER |
| LSY5171-23B | <i>MATα sae2::KanMX6</i>                          | gRNA-17  | Perfect   | P <sub>lexO</sub> -Cas9-ER |
| LSY5171-44C | <i>MATα sae2::KanMX6 rad1::HphMX4</i>             | gRNA-17  | Perfect   | P <sub>lexO</sub> -Cas9-ER |
| LSY5171-46A | <i>MATa sae2::KanMX6 pol3-01</i>                  | gRNA-17  | Perfect   | P <sub>lexO</sub> -Cas9-ER |
| LSY5235-1   | <i>MATα sae2::KanMX6 pol3-01<br/>rad1::HphMX4</i> | gRNA-17  | Perfect   | P <sub>lexO</sub> -Cas9-ER |
| LSY5169     | <i>MATα rad51::NatMX4</i>                         | gRNA-17  | Native    | P <sub>lexO</sub> -Cas9-ER |
| LSY5000-6D  | <i>MATa sae2::KanMX6 rad51::NatMX4</i>            | gRNA-17  | Native    | P <sub>lexO</sub> -Cas9-ER |
| LSY4880     | <i>MATa pol32::NatMX4</i>                         | gRNA-17  | Native    | P <sub>lexO</sub> -Cas9-ER |
| LSY4999-3A  | <i>MATa sae2::KanMX6 pol32::NatMX4</i>            | gRNA-17  | Native    | P <sub>lexO</sub> -Cas9-ER |

|             |                                                                                   |         |        |                            |
|-------------|-----------------------------------------------------------------------------------|---------|--------|----------------------------|
| LSY5750-6C  | <i>MATa mus81::HphMX4</i>                                                         | gRNA-17 | Native | P <sub>lexO</sub> -Cas9-ER |
| LSY5751     | <i>MATα sae2::KanMX6 mus81::HphMX4</i>                                            | gRNA-17 | Native | P <sub>lexO</sub> -Cas9-ER |
| LSY5732-37D | <i>MATa-inc hmlΔ hmrΔ leu2::P-GAL-HO-LEU2 ChrV-32878-32897::HOcs</i>              | HOcs    | Native | P <sub>GAL</sub> -HO       |
| LSY5744-2A  | <i>MATa-inc hmlΔ hmrΔ leu2::P-GAL-HO-LEU2 ChrV-32878-32897::HOcs sae2::KanMX6</i> | HOcs    | Native | P <sub>GAL</sub> -HO       |

## Supplementary Table 4. Oligonucleotides

### Oligos used to make gRNA constructs

| Oligo          | Sequence                      |
|----------------|-------------------------------|
| RF-gRNA-S      | 20xNGTTTTAGAGCTAGAAATAGCAAGT  |
| RF-gRNA-AS     | 20xNAAAGTCCCATTGCGCCACCCGAAGG |
| pCeASY-gRNA-S  | ttt20xNgtttagag               |
| pCeasy-gRNA-AS | CTAGctctaaaac20XNAaaa         |

### The sequences of gRNAs used in this study

| Oligo     | Sequence             | Coordinates <sup>1</sup> |
|-----------|----------------------|--------------------------|
| gRNA-17   | ACGTCCAAAATTGAATGACT | ChrV:32878-32897         |
| gRNA-48   | ATACTAATCCATGCCGCCAG | ChrV:32847-32866         |
| gRNA-160  | GTATATTAGAAACCCGATAA | ChrV:32735-32754         |
| gRNA_mut1 | TTGGACGTACAAAGTTCCAC | ChrV:32885-32866         |
| gRNA_mut2 | GCCAACTACACTAAGTTCCA | ChrV:32900-32919         |
| pol3-01   | ACCAGCACACTCGATATCAA | ChrIV:277840-277830      |

<sup>1</sup>The coordinate listed are based on the S288C reference genome

### Oligos use to make the repair templates for CRISPR-Cas9 gene editing

| Oligo               | Sequence                                                       |
|---------------------|----------------------------------------------------------------|
| IR_500_upstream_F   | TGTTAGTTTAGGGTCATTGTAT                                         |
| IR_500_downstream_R | GAAGCATATGTACAATGAGC                                           |
| Left_IR_perfect_R   | AATCACTTTTGCCCaaGAACTTAGTGTAGT                                 |
| Right_IR_perfect_F  | ACTACACTAAGTTcttGGGCAAAAGTGATT                                 |
| Left_scrambledIR_R  | ttTGCAttCGatCTCcAtATTcAGCGgGCTTAGTGTAGTTGGCCAAGTC              |
| Right_scrambledIR_F | CcCGCTgAATaTgGAGatCGaaTGCAaaAACCAATACATGTAACCATTG              |
| pol3-01_middle      | ATCCTACCAGCACACGCGATAGCAAAGGACATGATACGCAATGGAGCTGT             |
| pol3-01_left        | CCTAATAGCACATCCTGCTGAGGGTGATTGGTCTCATACAGCTCCATTGC             |
| pol3-01_right       | GTGTGCTGGTAGGATTGGCGTCTTTCCGGAACCTGAATACGATCCCGTCA             |
| pol3-01_mut_F       | GTTTCAATTAATTATCGTAACCTAATAGCACATCCTGCTG                       |
| pol3-01_mut_R       | CACAACGTTGGCAATTTGGATGACGGGATCGTATTCAGG                        |
| HOcs_gRNA2_mut_F3   | AGTTTCAGCTTTCCGCAACAGTATAATTTTATAAACAAAGTTCCAGG<br>GCAAaagtgat |
| HOcs_gRNA2_mut_R3   | GTTGCGGAAAGCTGAAACTAAAGTTCCACTGGCGGCA                          |

**Oligos used for screening survivors**

| <b>Oligo</b> | <b>Sequence</b>          | <b>Coordinates<sup>1</sup></b> |
|--------------|--------------------------|--------------------------------|
| P1           | CATCACCCCTGTGCGTTTTACAAG | ChrV:8772-8794                 |
| P2           | AATGAGTCAGCTGGATCTATTGCT | ChrV:9199-9176                 |
| P3           | AGGAAACCCAACCTAAGAAC     | ChrV:32602-32621               |
| P4           | GTGGGCGCTCTTATATCAT      | ChrV:33109-33091               |
| P5           | CGGGTGTTATGCCAACGTTG     | ChrV:60074-60093               |
| P6           | GGCAACTGTCTACCTATTTCCAT  | ChrV:60140-60118               |
| P7           | TGATGGCTCTTGGAACGGAT     | ChrV:32503-32522               |
| P8           | CGCTCTTTCCCGACGAGA       | ChrV:33310-33293               |

**Other oligos**

| <b>Oligo</b>            | <b>Sequence</b>         | <b>Coordinates</b>  |
|-------------------------|-------------------------|---------------------|
| P9 (ADH1 F)             | TAAGGGCTGGAAGATCGGTGAC  | ChrXV:160355-160334 |
| P10 (ADH1 R)            | CGTCGTGGGTGTAACCAGACA   | ChrXV:160225-160245 |
| P11 (17bp upstream F)   | AATGACTTGGCCAACACTACAC  | ChrV:32891-32910    |
| P12 (17bp downstream R) | TTTATCCACACCTCTGACCAACG | ChrV:33140-33118    |
| P13 (CAN1 control F)    | GACCTGTACCAATAGTACCACC  | ChrV:33151-33172    |
| P14 (CAN1 control R)    | ACAGAGTAAACCGAATCAGGG   | ChrV:33677-33657    |
| P15 (MEC1 control F)    | GAGTACAGGCATGTGATGT     | ChrII:504971        |
| P16 (MEC1 control R)    | CCGAGTTCAGGTCTTTTATTGC  | ChrII:505728        |

**Supplementary Table 5. Plasmids used in this study**

| Plasmid | Description                                                                                                                                                   | Marker      | Source                         |
|---------|---------------------------------------------------------------------------------------------------------------------------------------------------------------|-------------|--------------------------------|
| pML107  | <i>P<sub>TDH3</sub></i> -CAS9-NLS with gRNA expression cassette                                                                                               | <i>LEU2</i> | (Laughery, Hunter et al. 2015) |
| pAA1    | <i>P<sub>GAL1</sub></i> -CAS9-NLS with gRNA expression cassette with Bael site for gRNA cloning                                                               | <i>LEU2</i> | This study                     |
| pAA3    | <i>P<sub>GAL1</sub></i> -CAS9-NLS-FLAG in pRG203MX backbone                                                                                                   | <i>HIS3</i> | This study                     |
| pCAS    | <i>P<sub>GAL1</sub></i> -CAS9-NLS with <i>P<sub>IRNA-LYS-HDV_ribozyme-sgRNA-T<sub>SNR52</sub></sub></i>                                                       | <i>Kan</i>  | (Ryan, Poddar et al. 2016)     |
| pCeASY  | <i>P<sub>GAL1</sub></i> -CAS9-NLS with <i>P<sub>IRNA-LYS-HDV_ribozyme-sgRNA-T<sub>SNR52</sub></sub></i> , with Zral-Xbal gRNA cloning sites                   | <i>Kan</i>  | R. Gnügge                      |
| pAA9    | <i>P<sub>IRNA-LYS-HDV_ribozyme-sgRNA-T<sub>SNR52</sub></sub></i> , with Zral-Xbal gRNA cloning sites in pRG205MX backbone                                     | <i>LEU2</i> | This study                     |
| pRG634  | <i>lexO-HO</i> in pRG205MX background                                                                                                                         | <i>LEU2</i> | R. Gnügge                      |
| pRG635  | <i>P<sub>ACT1</sub></i> -LEXA-ER-B112- <i>T<sub>CYC1</sub></i> in pRG203MX background                                                                         | <i>HIS3</i> | R. Gnügge                      |
| pAA12   | <i>lexO-linker-T<sub>ADH1</sub></i> <i>P<sub>ACT1</sub></i> -LEXA-ER-B112- <i>T<sub>CYC1</sub></i>                                                            | <i>HIS3</i> | This study                     |
| pAA13   | <i>P<sub>IRNA-LYS-HDV_ribozyme-sgRNA17-T<sub>SNR52</sub></sub></i> in pRG205MX                                                                                | <i>LEU2</i> | This study                     |
| pAA16   | <i>lexO-CAS9-NLS-FLAG-T<sub>ADH1</sub></i> <i>P<sub>ACT1</sub></i> -LEXA-ER-B112- <i>T<sub>CYC1</sub></i> in pRG203MX                                         | <i>HIS3</i> | This study                     |
| pAA18   | <i>lexO-CAS9-ER-NLS-FLAG-T<sub>ADH1</sub></i> <i>P<sub>ACT1</sub></i> -LEXA-ER-B112- <i>T<sub>CYC1</sub></i> in pRG203MX                                      | <i>HIS3</i> | This study                     |
| pAA19   | <i>lexO-CAS9-NLS-FLAG-T<sub>ADH1</sub></i> <i>P<sub>ACT1</sub></i> -LEXA-ER-B112- <i>T<sub>CYC1</sub></i> in pRG203MX (CAS9 and LEXA-ER-B112 tail to tail)    | <i>HIS3</i> | This study                     |
| pAA20   | <i>lexO-CAS9-ER-NLS-FLAG-T<sub>ADH1</sub></i> <i>P<sub>ACT1</sub></i> -LEXA-ER-B112- <i>T<sub>CYC1</sub></i> in pRG203MX (CAS9 and LEXA-ER-B112 tail to tail) | <i>HIS3</i> | This study                     |
| pAA21   | <i>P<sub>IRNA-LYS-HDV_ribozyme-sgRNA48-T<sub>SNR52</sub></sub></i> in pRG205MX                                                                                | <i>LEU2</i> | This study                     |
| pAA22   | <i>P<sub>IRNA-LYS-HDV_ribozyme-sgRNA160-T<sub>SNR52</sub></sub></i> in pRG205MX                                                                               | <i>LEU2</i> | This study                     |
| pAA23   | <i>P<sub>GAL1</sub></i> -CAS9-NLS with <i>P<sub>IRNA-LYS-HDV_ribozyme-sgIR-gRNA_mut2-T<sub>SNR52</sub></sub></i>                                              | <i>Kan</i>  | This study                     |
| pAA24   | <i>P<sub>GAL1</sub></i> -CAS9-NLS with <i>P<sub>IRNA-LYS-HDV_ribozyme-sgRNApol3-01-T<sub>SNR52</sub></sub></i>                                                | <i>Kan</i>  | This study                     |

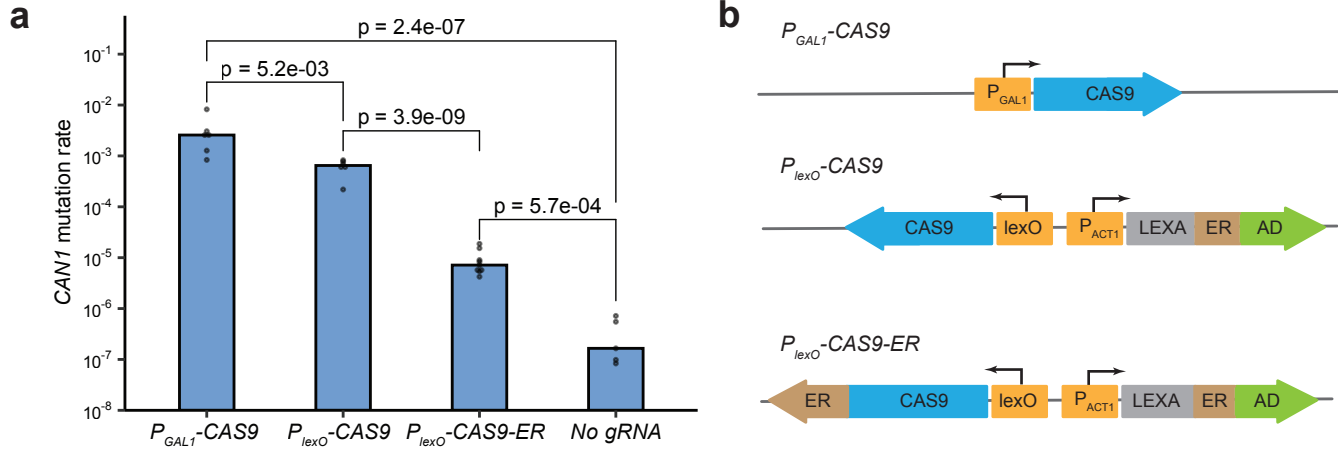

**Supplementary Figure 1. Leaky expression of Cas9.** **a**, Spontaneous mutation rate of *CAN1* in WT cells carrying the indicated the Cas9 constructs with a gRNA targeting the *CAN1* locus or without gRNA. Cas9 expression was not induced during the experiment. P values were determined using a two-tailed t-test.  $P_{GAL1}$ -CAS9,  $n=6$ ;  $P_{lexO}$ -CAS9,  $n=6$ ;  $P_{lexO}$ -CAS9-ER,  $n=9$ ; no gRNA,  $n=5$ ; 2-4 biological replicas. **b**, Constructs used to express Cas9. Source data are provided as Source Data Supplementary Figure 1.



**a**

gRNA-17bp

```
Parental  GCCAGTGGAACTTTGTACGTCCAAAATTGAATG-ACCTTGGCCAACTACA
WT-24    GCCAGTGGAACTTTGTACGTCCAAAATTGAATG-ACCTTGGCCAACTACA
WT-3     GCCAGTGGAACTTTGTACGTCCAAAATTGAATG-ACCTTGGCCAACTACA
WT4-t-4  GCCAGTGGAACTTTGTACGTCCAAAATTGAATG-ACCTTGGCCAACTACA
WT2-m-2  GCCAGTGGAACTTTGTACGTCCAAAATTGAATG-ACCTTGGCCAACTACA
WT4-t-9  GCCAGTGGAACTTTGTACGTCCAAAATTGAATG-ACCTTGGCCAACTACA
WT-3-t-6 GCCAGTGGAACTTTGTACGTCCAAAATTGAATG-ACCTTGGCCAACTACA
WT-10    GCCAGTGGAACTTTGTACGTCCAAAATTGAATG-ACCTTGGCCAACTACA
```

**b**

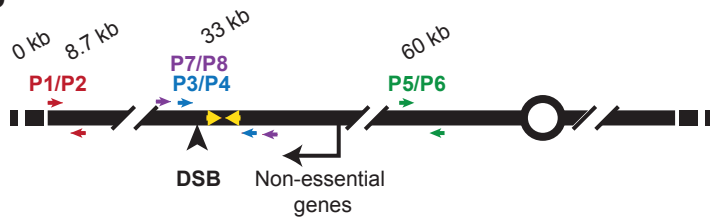

**c**

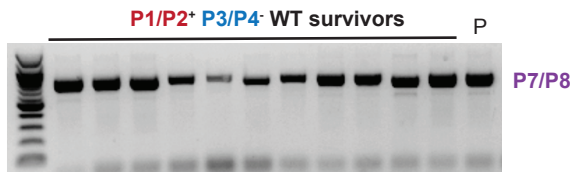

**d**

P7...79bp...P3...188bp...

gRNA-17bp

```
CAN1  AGGGAACAAGTTCATTATTGTGATAATTACCCAAAAAATACTAATCCATGCCGCCAGTGGAACTTTGTACGTCCAAAATTGAATGACTTGGCCAACTACA
WT-7  AGGGAACAAGTTCATTATTGTGATAATTACCCAAAAAATACTAATCCATGCCGCCAGTGGAACTTTGTACGTCCAAAATTGAATGACTTGGCCAACTACA
WT-2  AGGGAACAAGTTCATTATTGTGATAATTACCCAAAAAATACTAATCCATGCCGCCAGTGGAACTTTGTACGTCCAAAATTGAATGACTTGGCCAACTACA
WT-1  AGGGAACAAGTTCATTATTGTGATAATTACCCAAAAAATACTAATCCATGCCGCCAGTGGAACTTTGTACGTCCAAAATTGAATGACTTGGCCAACTACA
WT-13 AGGGAACAAGTTCATTATTGTGATAATTACCCAAAAAATACTAATCCATGCCGCCAGTGGAACTTTGTACGTCCAAAATTGAATGACTTGGCCAACTACA
LYP1  AGGGAACAAGTTCATTATTGTGATAATTACCCAAAAAATACTAATCCATGCCGCCAGTGGAACTTTGTACGTCCAAAATTGAATGACTTGGCCAACTACA
```

P4

```
CAN1  CTAAGTTCCAGGGCAAAAGTGATTGCCAAGAAACCAATACATGTAACCAATTGGCCGCACCAATGCTGGAGAAAGGAATCTTTGTGAGAAAACGTGTA
WT-7  GAAACCTCCACAGCAATAAGTAAATAGCCCAAATGAACCAATACATGTAACCAATTGGCCGCACCAATGCTGGAGAAAGGAATCTTTGTGAGAAAACGTGTA
WT-2  GAAACCTCCACAGCAATAAGTAAATAGCCCAAATGAACCAATACATGTAACCAATTGGCCGCACCAATGCTGGAGAAAGGAATCTTTGTGAGAAAACGTGTA
WT-1  GAAACCTCCACAGCAATAAGTAAATAGCCCAAATGAACCAATACATGTAACCAATTGGCCGCACCAATGCTGGAGAAAGGAATCTTTGTGAGAAAACGTGTA
WT-13 GAAACCTCCACAGCAATAAGTAAATAGCCCAAATGAACCAATACATGTAACCAATTGGCCGCACCAATGCTGGAGAAAGGAATCTTTGTGAGAAAACGTGTA
LYP1  GAAACCTCCACAGCAATAAGTAAATAGCCCAAATGAACCAATACATGTAACCAATTGGCCGCACCAATGCTGGAGAAAGGAATCTTTGTGAGAAAACGTGTA
```

P8

```
CAN1  TGGGCCGGCGTTGGTCAGAGGTGTGGATAACCAATGAAAAGACCTGTACCAATAGTACCACCAAGGGCAATCATACCAATATGTCCTTTGCTTAAGCTCT
WT-7  AGGGCCAGCATTAATTCARAGGGAGTGGAGATACCAAAGAAAAGACCAGTACCAGATGTACCACCAAGTGCATCATACCAATATGTCCTTTGCTTAAGCTCT
WT-2  AGGGCCAGCATTAATTCARAGGGAGTGGAGATACCAAAGAAAAGACCAGTACCAGATGTACCACCAAGTGCATCATACCAATATGTCCTTTGCTTAAGCTCT
WT-1  AGGGCCAGCATTAATTCARAGGGAGTGGAGATACCAAAGAAAAGACCAGTACCAGATGTACCACCAAGTGCATCATACCAATATGTCCTTTGCTTAAGCTCT
WT-13 AGGGCCAGCATTAATTCARAGGGAGTGGAGATACCAAAGAAAAGACCAGTACCAGATGTACCACCAAGTGCATCATACCAATATGTCCTTTGCTTAAGCTCT
LYP1  AGGGCCAGCATTAATTCARAGGGAGTGGAGATACCAAAGAAAAGACCAGTACCAGATGTACCACCAAGTGCATCATACCAATATGTCCTTTGCTTAAGCTCT
```

**Supplementary Figure 2. Molecular analysis of survivor types from WT cells.** **a**, The P3/P4 primer PCR products from select WT clones were sequenced and show evidence of indels. **b**, Schematic of the left arm of Chr V showing the location of the DSB and inverted repeats (yellow arrows). Primer pairs to detect retention of terminal sequence, NHEJ events and *LYP1* conversions are shown in red, blue and purple, respectively. **c**, Clones that had P1/2 but not P3/4 PCR bands were amplified using the P7/P8 primer pair to detect the presence of sequences further away from P3/P4. **d**, Sanger sequence of P7/P8 primer PCR products shows evidence of *LYP1* conversions.

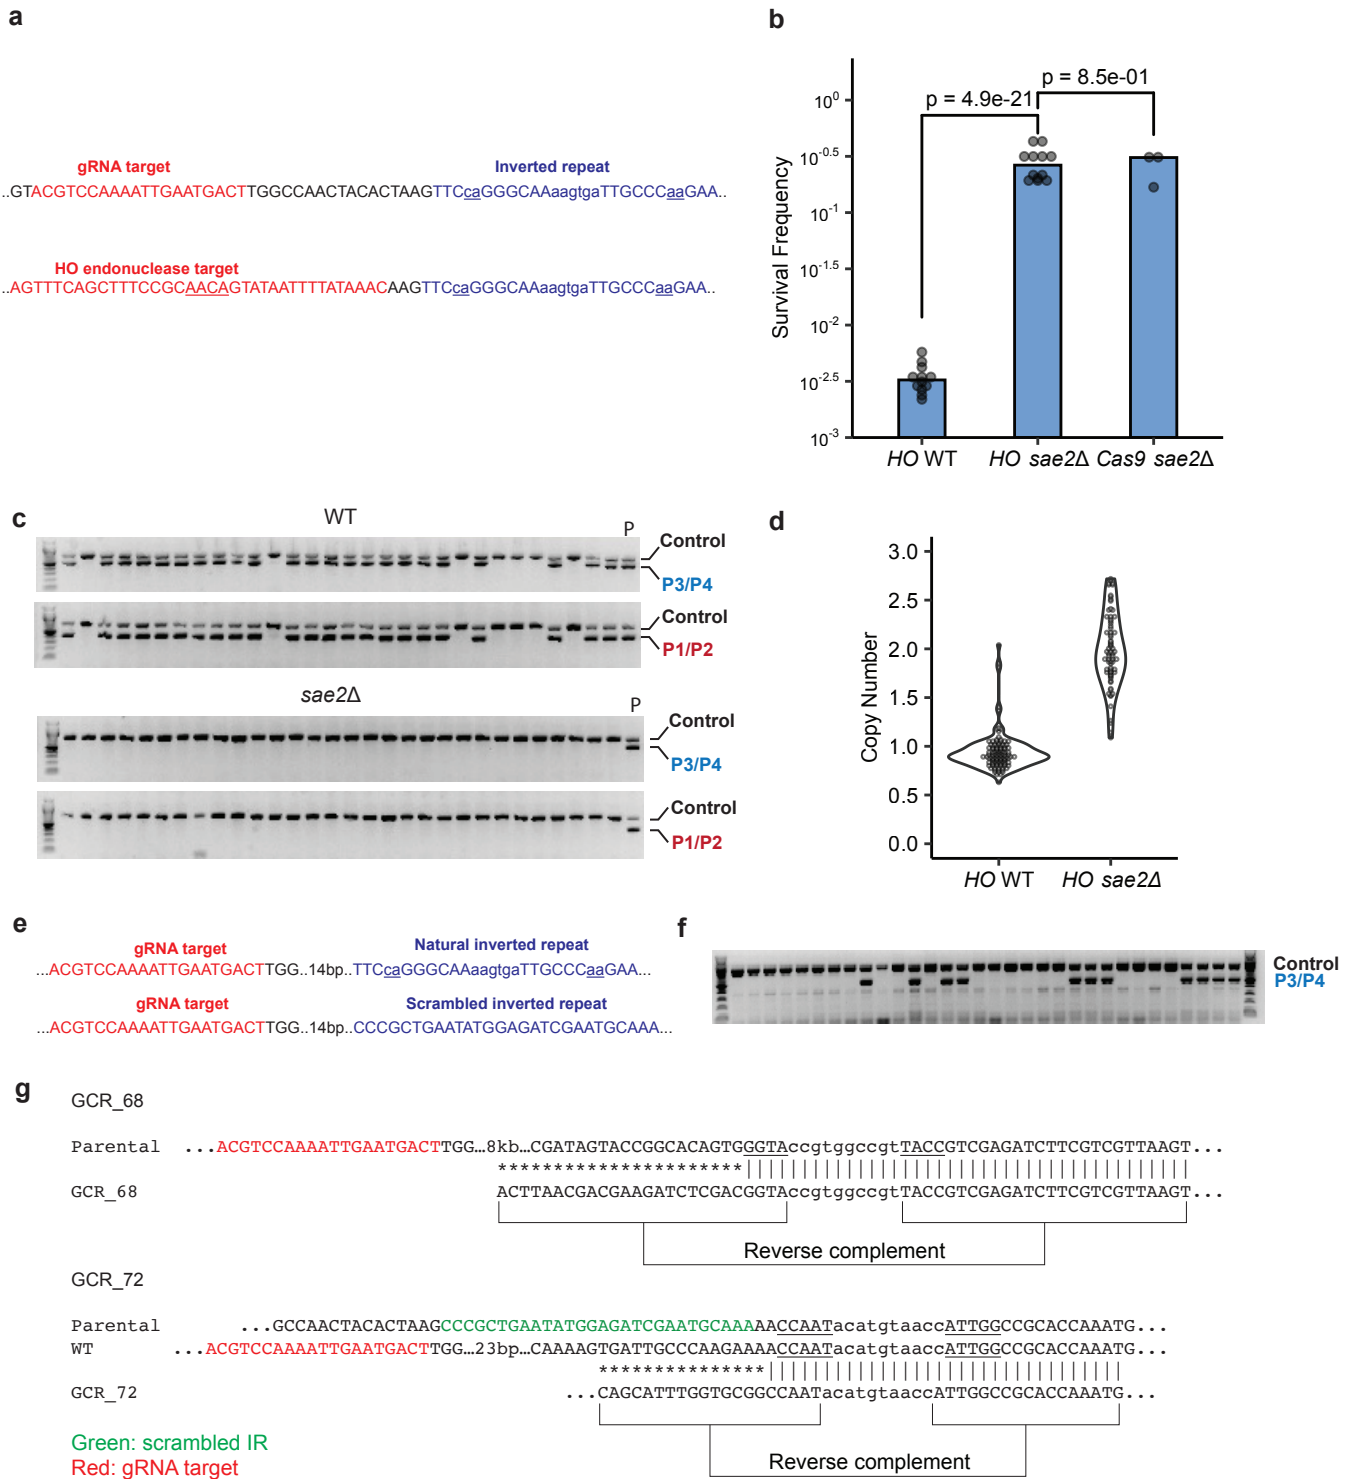

**Supplementary Figure 3. HO-induced inverted duplications and analysis of survivors from the scrambled IR strain.**

**a**, Sequence of the original gRNA target (top) and the HO cut site that replaces it (bottom). In both, red denotes the nuclease recognition sequence. Underlined in red: the HO cut site. In purple, the inverted repeat sequence. **b**, Survival frequencies of WT and *sae2Δ* either expressing HO or Cas9. P values were determined using a two-tailed t-test. WT HO,  $n=12$ ; *sae2Δ* HO,  $n=12$ ; *sae2Δ* Cas9,  $n=3$ ; 3 biological replicas except *sae2Δ* Cas9. **c**, Colony PCR using the indicated primers of cells surviving a DSB by HO adjacent to the IR. **d**, Copy number analysis by qPCR (primers P5/P6) of independent clones with the indicated genotypes surviving the HO-induced DSB. **e**, Sequence of the original IR and scrambled IR located 17 bp from the gRNA target sequence. **f**, The sequence at the center of the inverted duplications of two *sae2Δ* clones with the scrambled IR. Mismatches in the inverted repeat are shown in lower case. In red is the gRNA target sequence. For GCR\_72, the position of the scrambled IR within the unarranged sequence is shown for reference. **g**, 32 independent clones from *sae2Δ* cells with scrambled inverted repeat were analyzed using P3/4 primers to detect NHEJ events. Source data are provided as Source data Supplementary Figure 3.



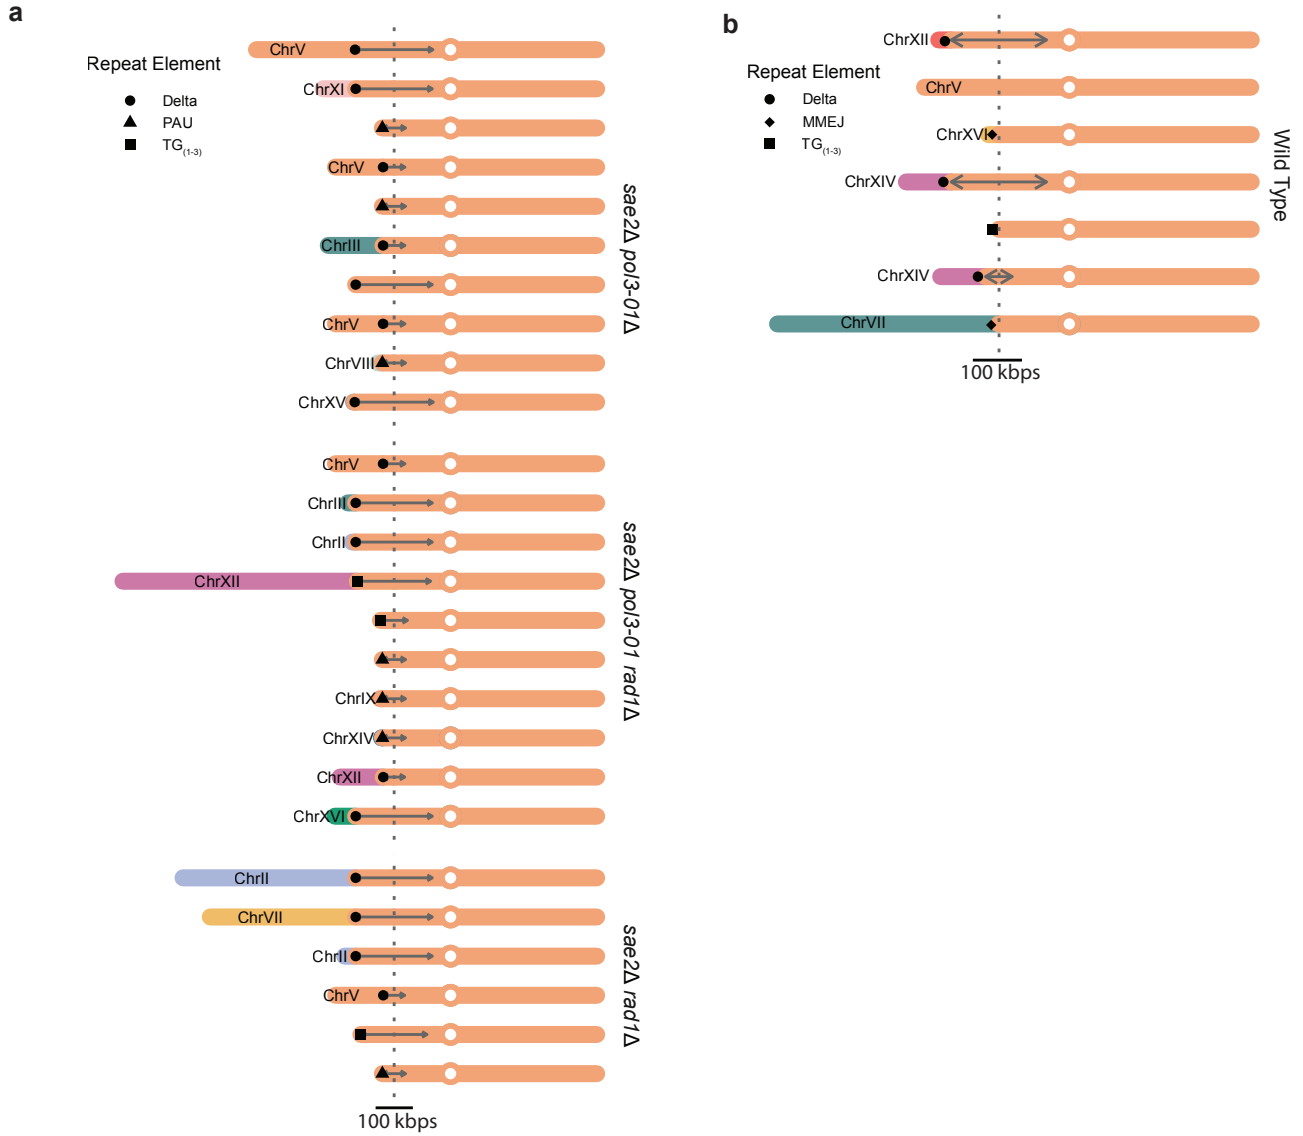

**Supplementary Figure 5. NGS analysis of inverted duplication clones. a**, Derivative Chr V in *sae2Δ rad1Δ*, *sae2Δ pol3-01* and 10 *sae2Δ rad1Δ pol3-01* clones . **b**, Derivative Chr V in WT clones, including those without inverted duplications.

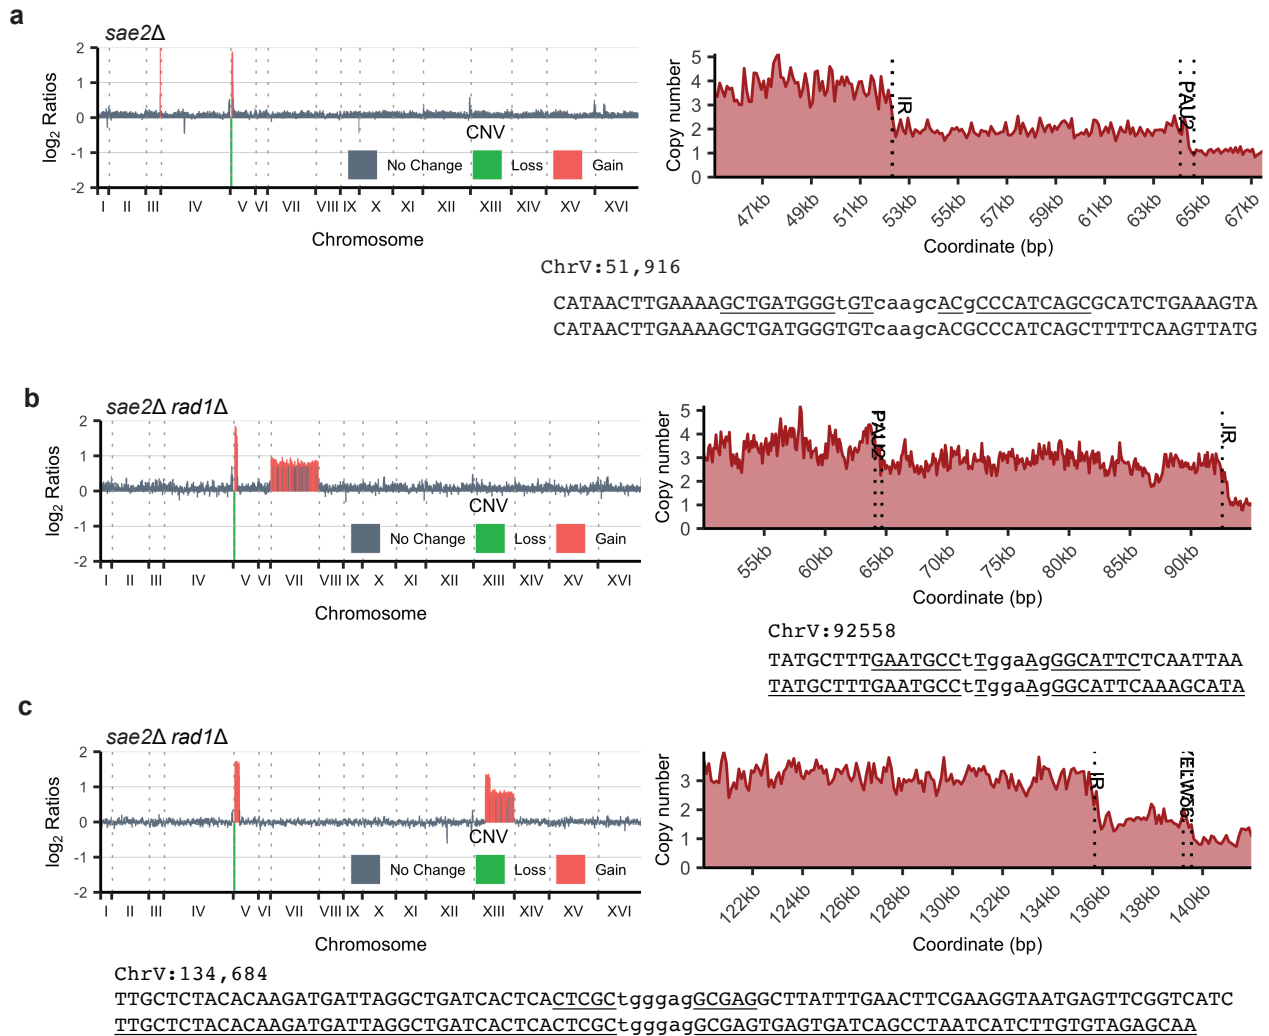

**Supplementary Figure 6. Complex rearrangements.** Clones that exhibit quadruplications centromeric to the target IR in a *sae2Δ* (a) and in two *sae2Δ rad1Δ* clones (b and c). Left: log<sub>2</sub> ratios of genome-wide copy number relative to parental reads. Right: relative copy number of junctions between the higher order duplication order copy number and duplication sequence, and between the latter and non-duplication sequence. In each case, a naturally occurring IR occurs at the junction of the drop in copy number. Below each panel is the IR sequence highlighted in the right panels and occur at the center of an inverted duplication.

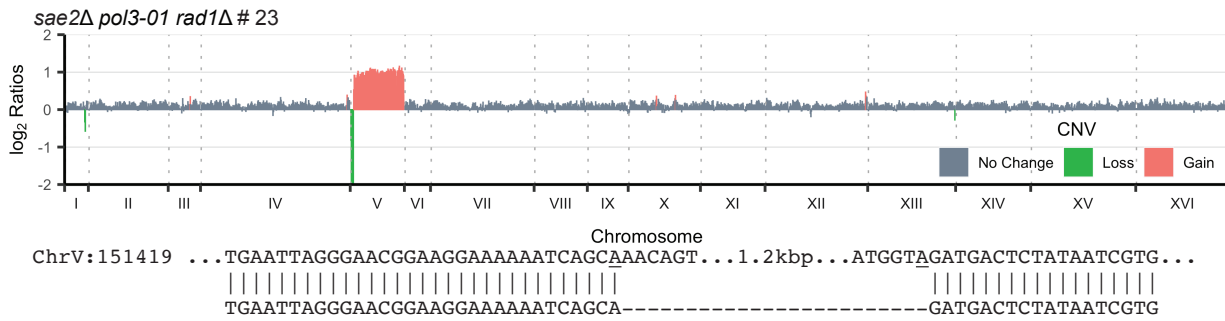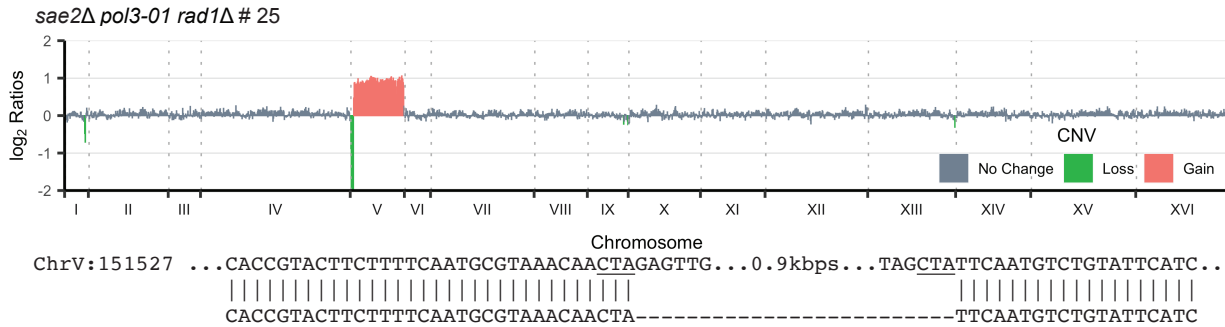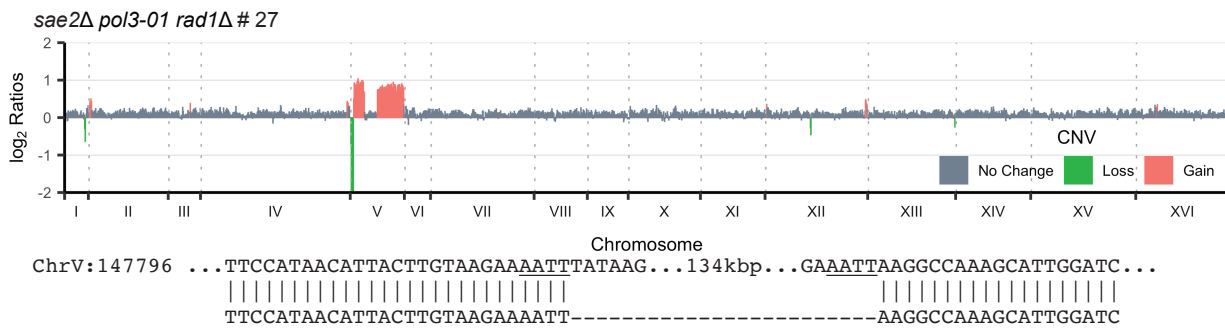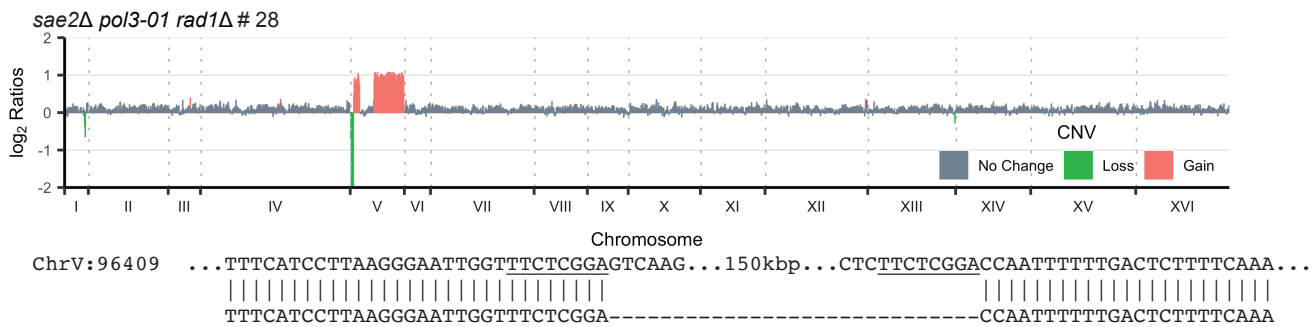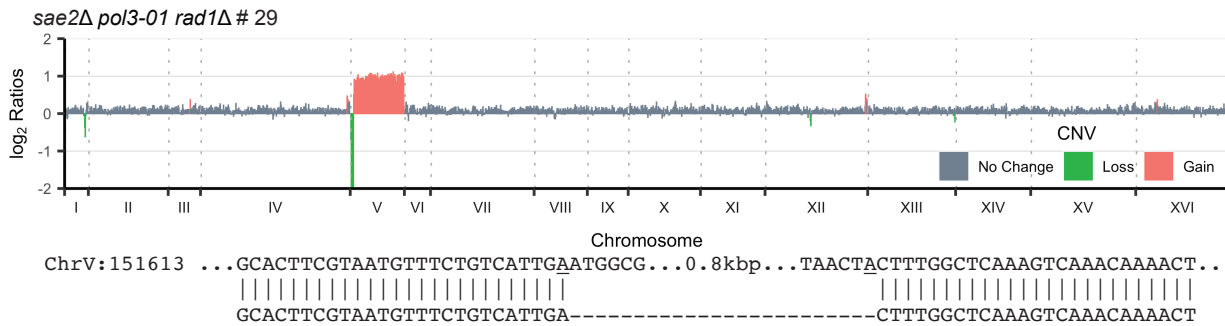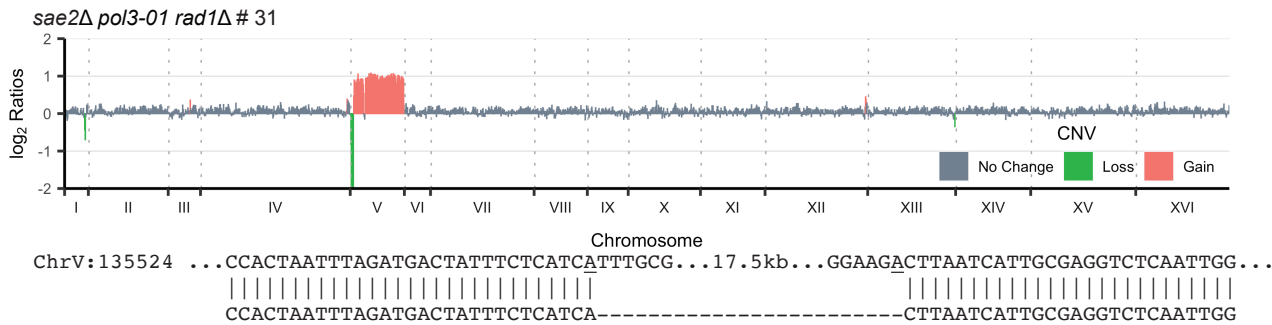

**Supplementary Figure 7.** Inverted duplications spanning most of the sequences centromeric to the DSB with a centromere loss. Genome-wide copy number analysis of 6 independent *sae2Δ rad1Δ pol3-01* clones that survived a DSB targeted by gRNA17. Below each copy number plot is the sequence at the junction of the rearrangement that spans a deleted *CEN5* and aligned to the parental sequence (coordinates are from the S288C genome published on SGD).

Supplementary Figure 2c

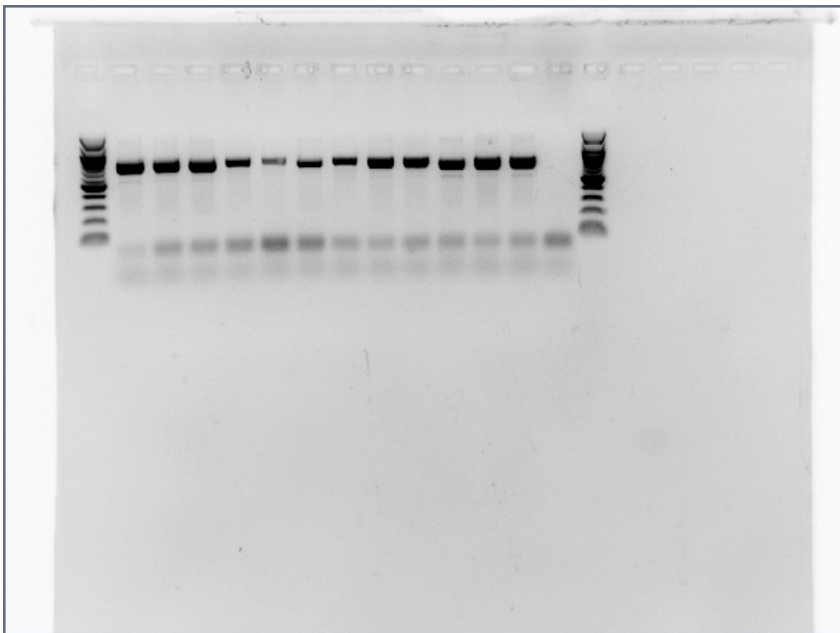



Supplementary Figure 3c

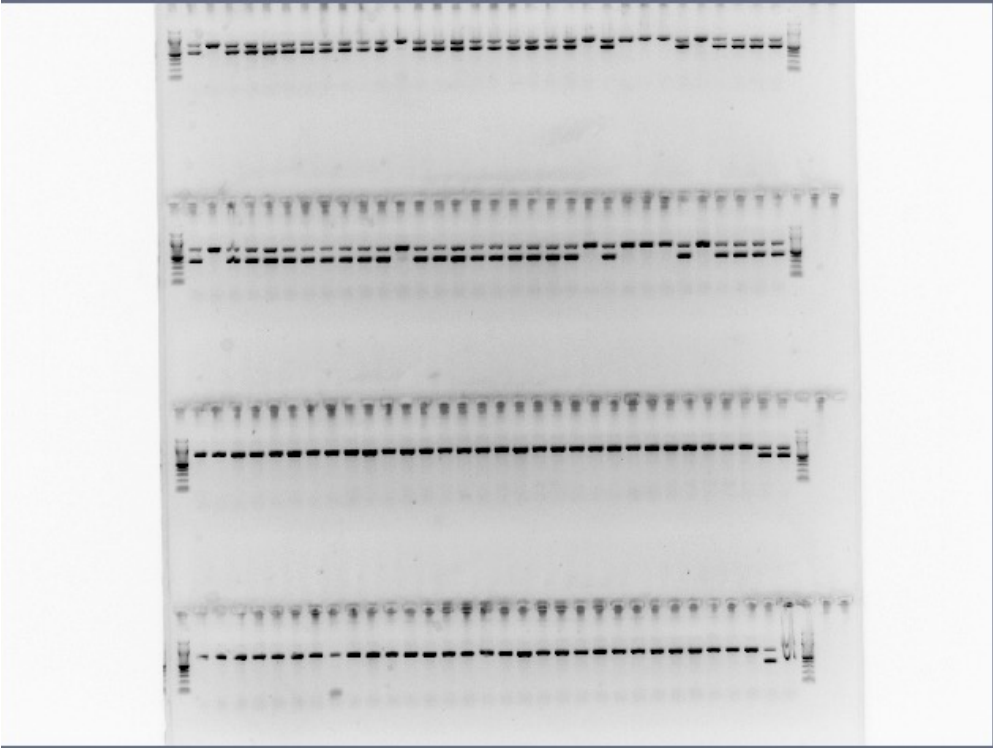

Supplementary Figure 3f

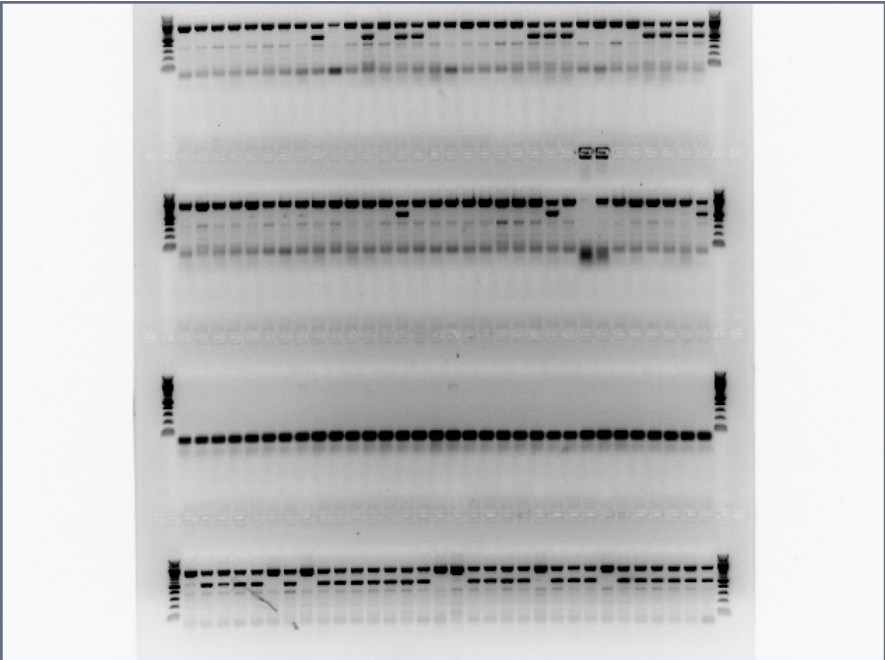

Supplementary Figure 4a

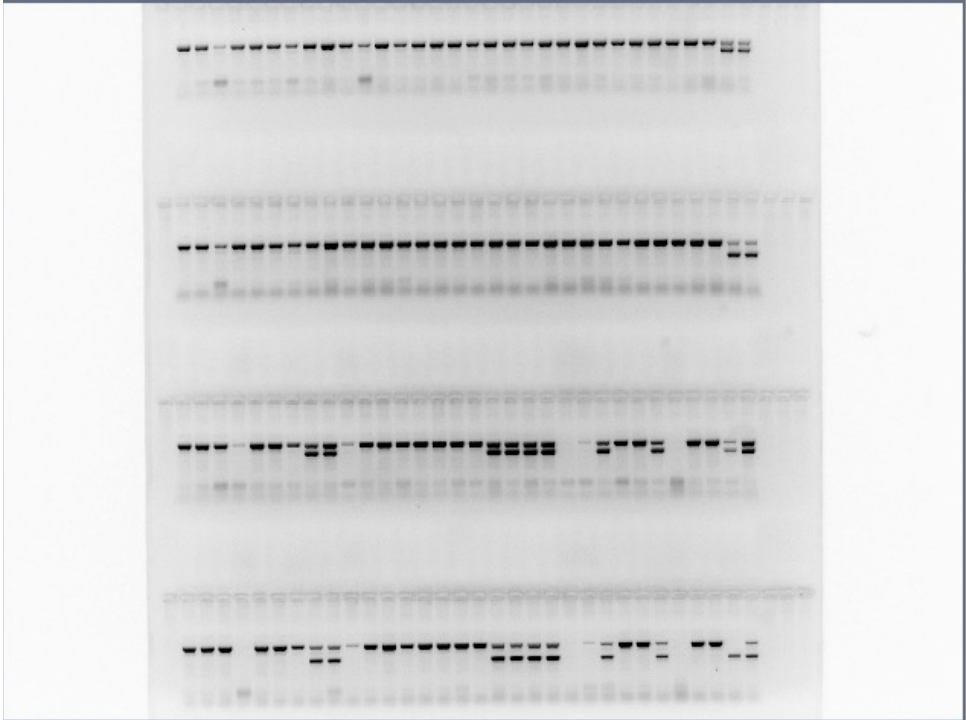

Supplement: 41467_2023_42640_MOESM1_ESM.pdf [file 41467_2023_42640_MOESM1_ESM.pdf]
